# Supplementary material
Source: PubMed Central journal article supplement (PMC5041162)
Supplement: bi6b00701_si_001.pdf [file bi6b00701_si_001.pdf]

## Supporting Information

### Chemistry and molecular dynamics simulations of heme *b*-HemQ and coproheme-HemQ

Stefan Hofbauer<sup>1</sup>, Marco Dalla Sega<sup>2</sup>, Stefan Scheiblbrandner<sup>3</sup>, Zuzana Jandova<sup>2</sup>, Irene Schaffner<sup>4</sup>, Georg Mlynek,<sup>1</sup> Kristina Djinović-Carugo<sup>1,6</sup>, Gianantonio Battistuzzi<sup>5</sup>, Paul G. Furtmüller<sup>4</sup>, Chris Oostenbrink<sup>2</sup>, Christian Obinger<sup>4\*</sup>

<sup>1</sup>*Department for Structural and Computational Biology, Max F. Perutz Laboratories, University of Vienna, A-1030 Vienna, Austria*

<sup>2</sup>*Department of Material Sciences and Process Engineering, Institute of Molecular Modeling and Simulation, BOKU – University of Natural Resources and Life Sciences, A-1190 Vienna, Austria*

<sup>3</sup>*Department of Food Science and Technology, Food Biotechnology Laboratory, BOKU – University of Natural Resources and Life Sciences, A-1190 Vienna, Austria*

<sup>4</sup>*Department of Chemistry, Division of Biochemistry, VIBT – Vienna Institute of BioTechnology, BOKU – University of Natural Resources and Life Sciences, A-1190 Vienna, Austria*

<sup>5</sup>*Department of Chemistry and Geology, University of Modena and Reggio Emilia, 41125 Modena*

<sup>6</sup>*Department of Biochemistry, Faculty of Chemistry and Chemical Technology, University of Ljubljana, 1000 Ljubljana, Slovenia*

**Figure S1. Simulation of the kinetics of coproheme binding to apo-HemQ.** Simulation of coproheme binding to (A, B) apo-LmHemQ and (C, D) apo-SaHemQ using the Pro-K software (Applied Photophysics) according to the model:  $a + b > c$ ;  $c > d$ .  $a$  - coproheme: black line;  $c$  - coproheme-HemQ intermediate: green line;  $d$  - coproheme bound to HemQ: red line. Insets depict calculated concentration profiles over time of binding. Lower panels show time traces and simulated double exponential fits at 390 nm.

**Figure S2. Coproheme and heme *b* binding to apo-myoglobin.** (A) UV-vis absorption spectra of coproheme (black) and after addition of excess apo-myoglobin (red). (B) UV-vis absorption spectra of hemein (black) and after addition of excess apo-myoglobin (red). The inset show time traces of absorbance changes in the Soret region.

**Figure S3. Heme transfer from coproheme-HemQ and heme *b*-HemQ to apo-myoglobin.** Incubation of (A) 1  $\mu$ M coproheme-SaHemQ or (B) 1  $\mu$ M heme *b*-SaHemQ with 10  $\mu$ M apo-myoglobin. Spectra prior to addition are shown as solid black lines, resulting spectra are shown as solid red lines. Insets show absorbance change in the Soret region. Conditions: 50 mM phosphate buffer, pH 7.0.

**Figure S4. Thermal stability of apo-HemQs, heme *b*-HemQs and coproheme-HemQs followed by differential scanning calorimetry.** Thermograms (black line) and fits of the endotherms (grey lines) of apo-LmHemQ, coproheme bound LmHemQ, and heme *b*-LmHemQ. Conditions: 50 mM phosphate buffer, pH 7.0.

**Figure S5. pH-dependence of UV-vis absorption spectra of HemQ.** UV-vis absorption spectra and corresponding 2<sup>nd</sup> derivatives of (A) LmHemQ and (B) SaHemQ at different pH values. Conditions: 50 mM citrate/phosphate buffer, pH 5.5 - 7.0; 50 mM phosphate buffer, pH 6.5 - 8.0, 50 mM glycine/NaOH buffer, pH 8.0 - 10.0.

**Figure S6. Electronic circular dichroism spectroscopy of coproheme-HemQ and heme *b*-HemQ.** (A, C) Far-UV spectra of 5  $\mu$ M apo-HemQs (pink), coproheme-HemQs (black), and heme *b*-HemQs (green) of (A) LmHemQ and (C) SaHemQ in 5 mM phosphate buffer, pH 7.0; spectra are shifted by -5 mdeg for clarity. Insets depict the ratios of ellipticity minima. (B, D) Near-UV and visible ECD spectra of 10  $\mu$ M coproheme-HemQs (black), of coproheme-HemQs in presence of 1 mM cyanide (red), heme *b*-HemQs (green), and 10  $\mu$ M coproheme (blue, dashed) of (B) LmHemQ and (D) SaHemQ in 50 mM phosphate buffer, pH 7.0. The insets show the corresponding UV-vis absorption spectra, recorded simultaneously.

**Figure S7. Root-mean-square fluctuations of the protein backbone of apo-LmHemQ, coproheme-LmHemQ and heme *b*-LmHemQ.** RMSF analysis of 30 ns MD simulations of (A) apo-LmHemQ and (B) coproheme-LmHemQ and 10 ns of (C) heme *b*-HemQ over the entire protein sequence (i.e. all 5 subunits).

**Figure S8. Root-mean-square deviation and fluctuation of the protein backbone of monomeric and pentameric apo-LmHemQ and coproheme-LmHemQ.** (A) RMSD calculations with respect to the initial structure for chain A simulated as monomer (apo-LmHemQ in black; coproheme-LmHemQ in red) and in the pentameric form (apo-LmHemQ in green; coproheme-LmHemQ in blue). (B) RMSF analysis of the same simulations. Early onset of unfolding can be observed around residues 125 and 150 – 175 in the apo-LmHemQ simulations.

**Figure S9. Accessibility of the coproheme/substrate binding site in apo-LmHemQ and coproheme-LmHemQ.** Surface representations of (A) apo-LmHemQ (pdb-code: 4WWS) and (B) coproheme-LmHemQ (last frame of 30 ns simulation) shown in yellow; surface of backbone atoms of R179 are shown in cyan, nitrogens of R179 in blue, oxygens in red, and hydrogens in grey. Coproheme in (B) is shown as grey sticks.

Fig. S1

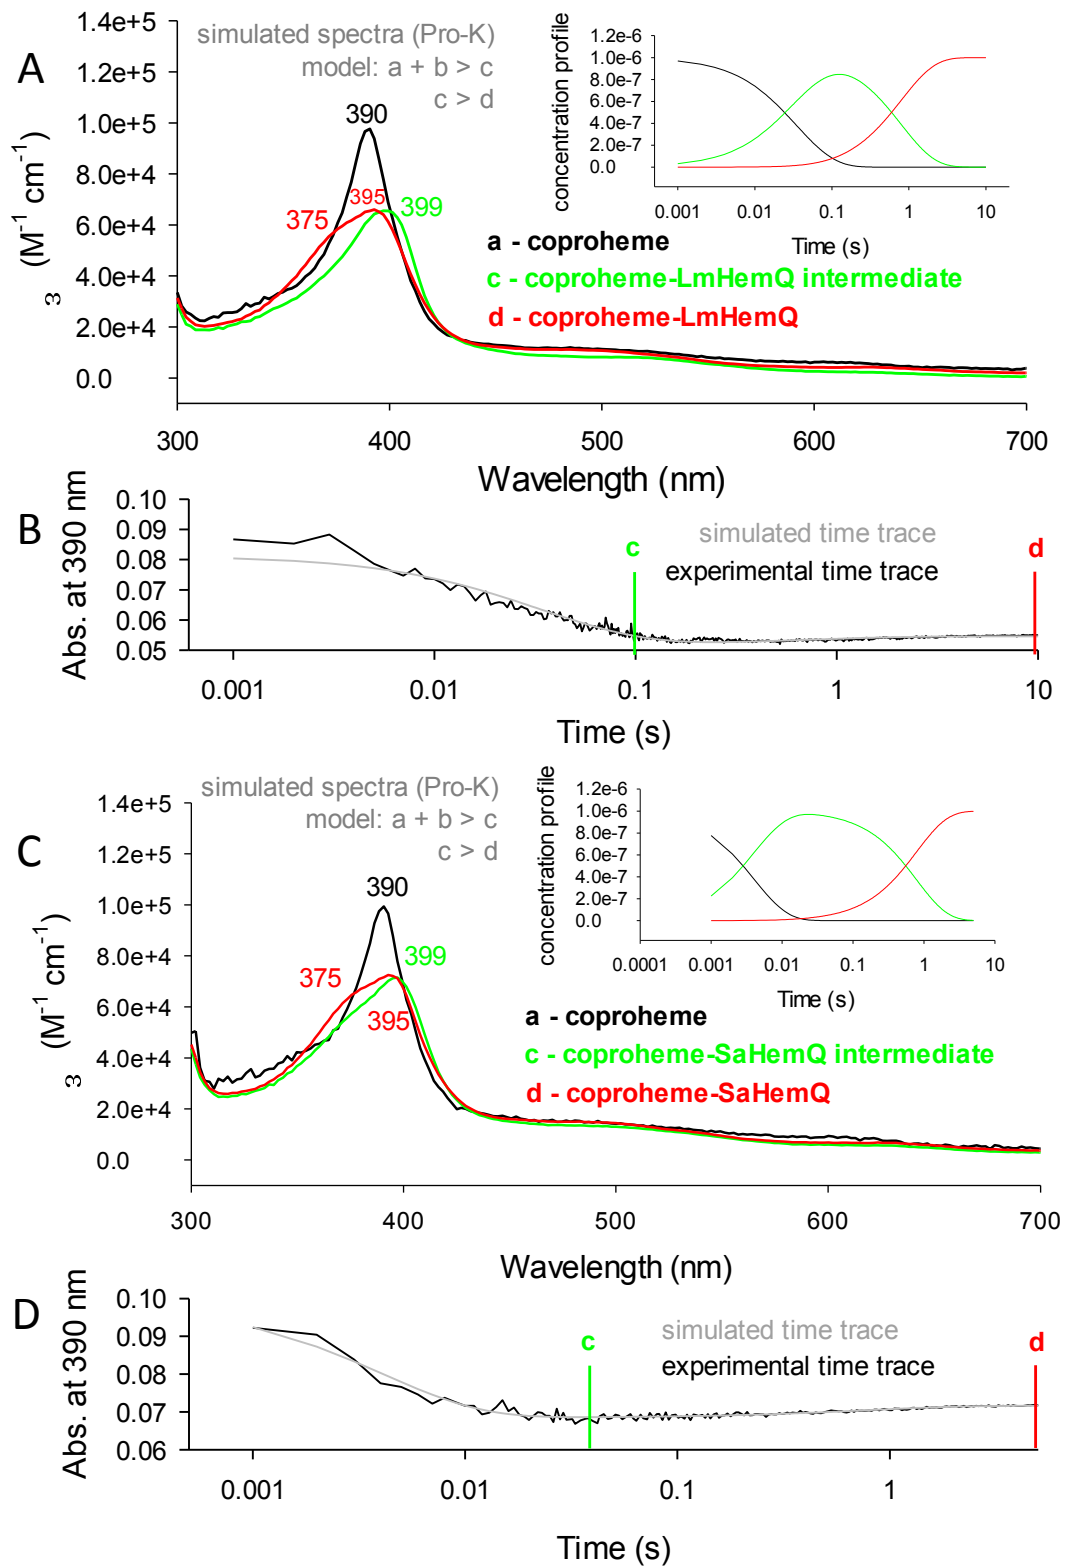

Fig. S2

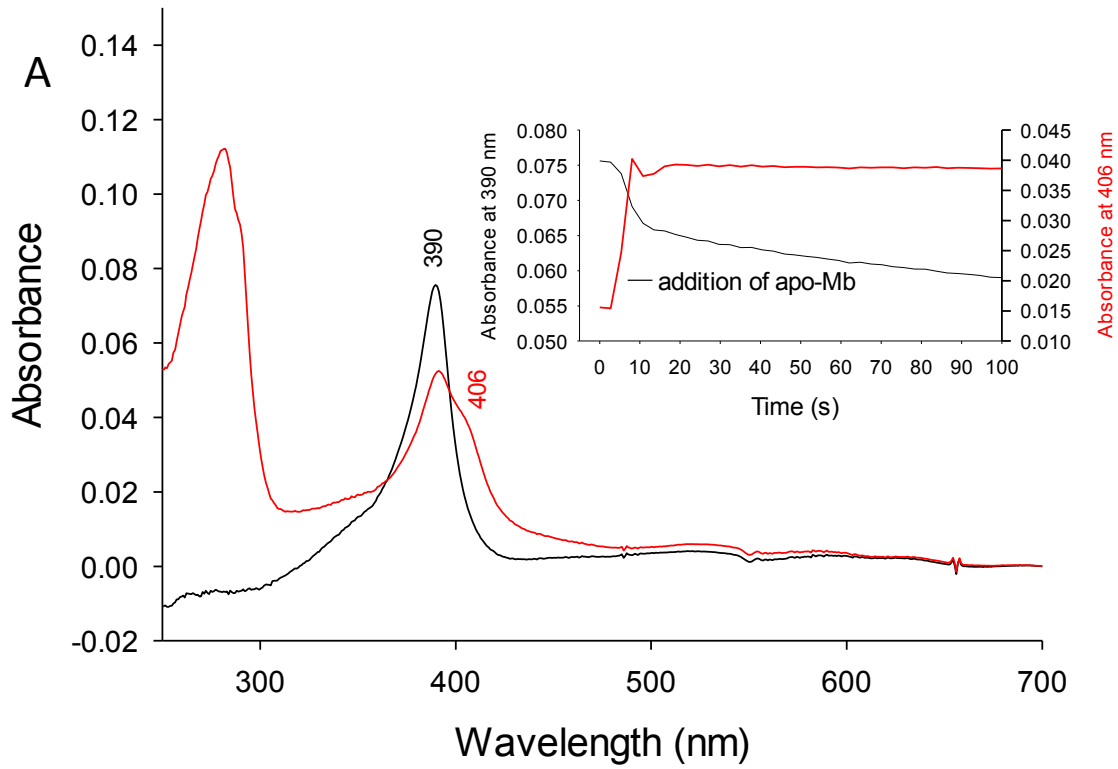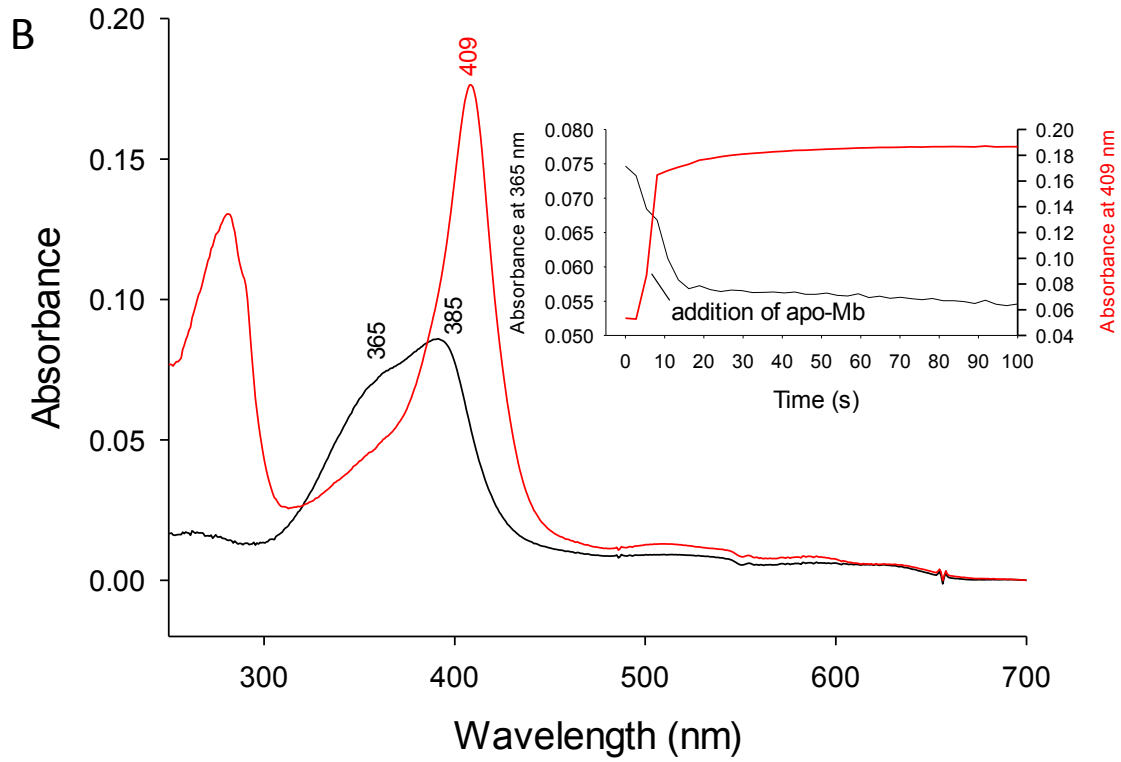

Fig. S3

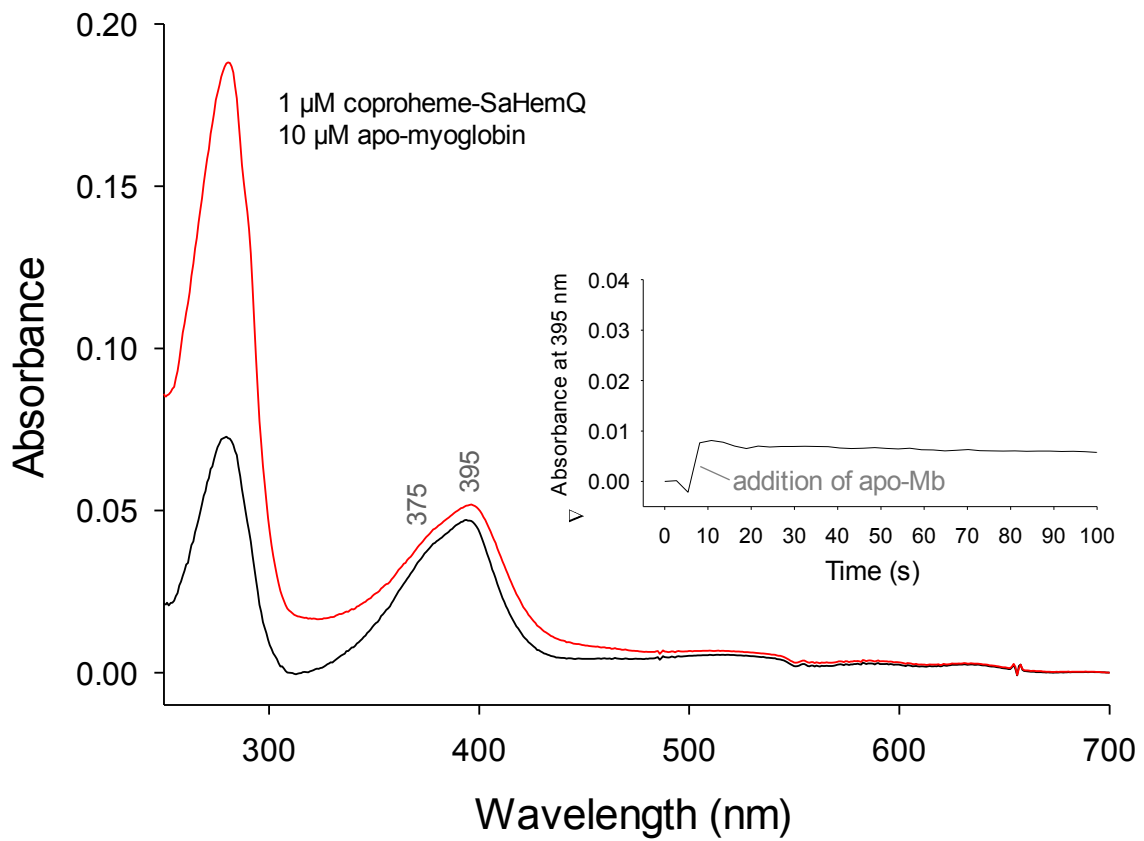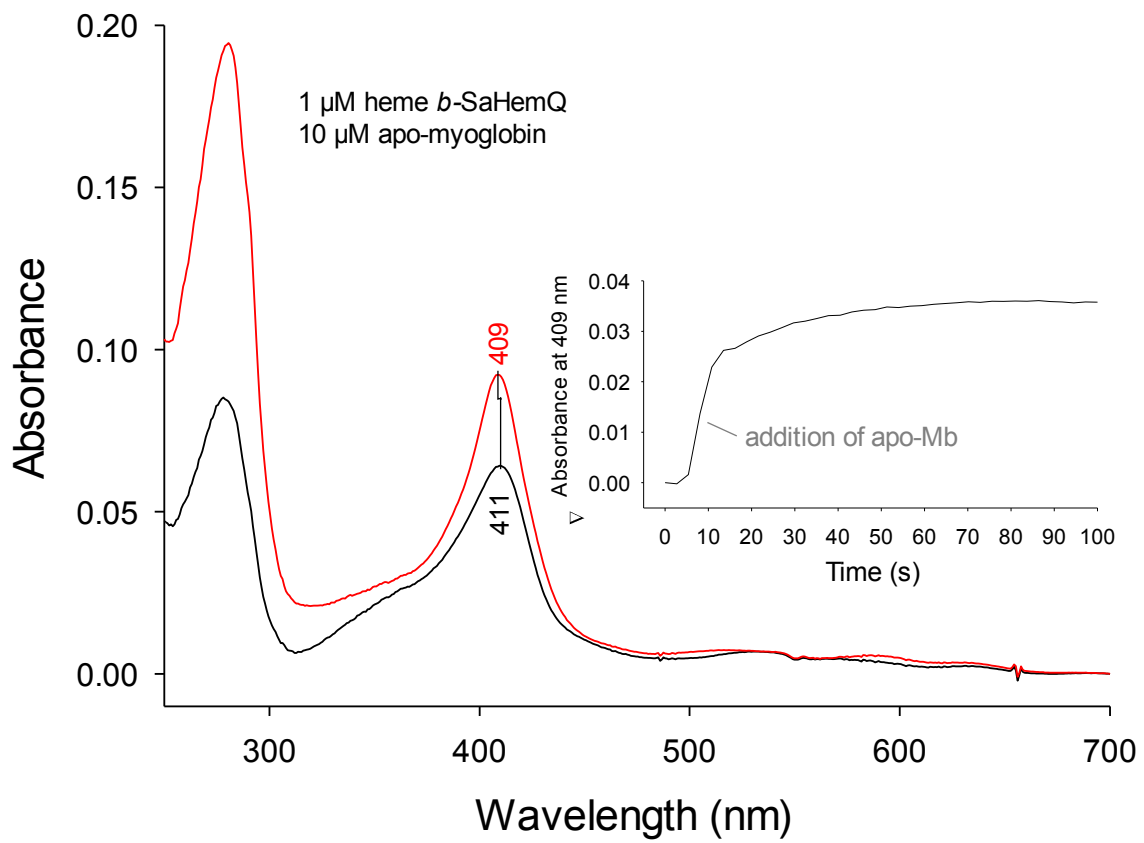

Fig. S4

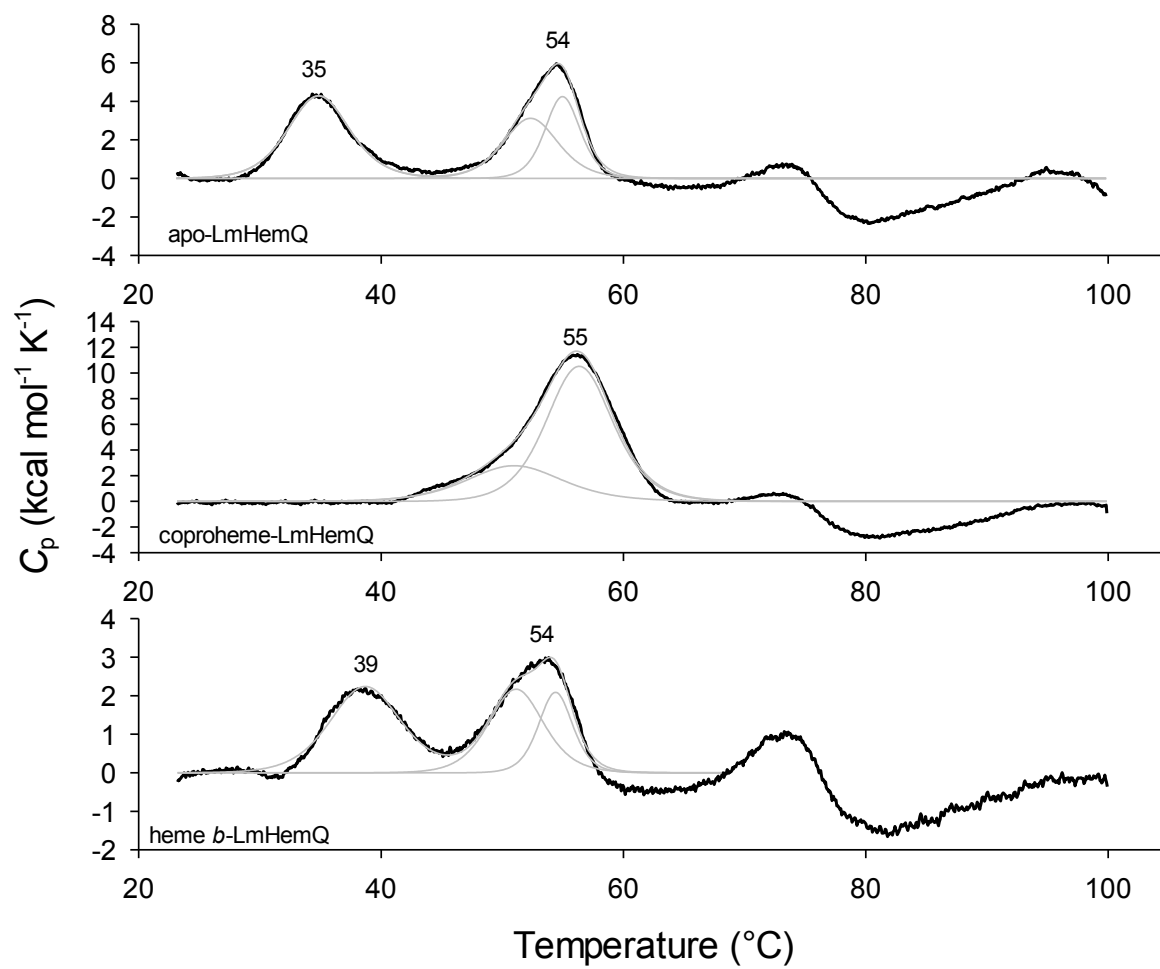

Fig. S5

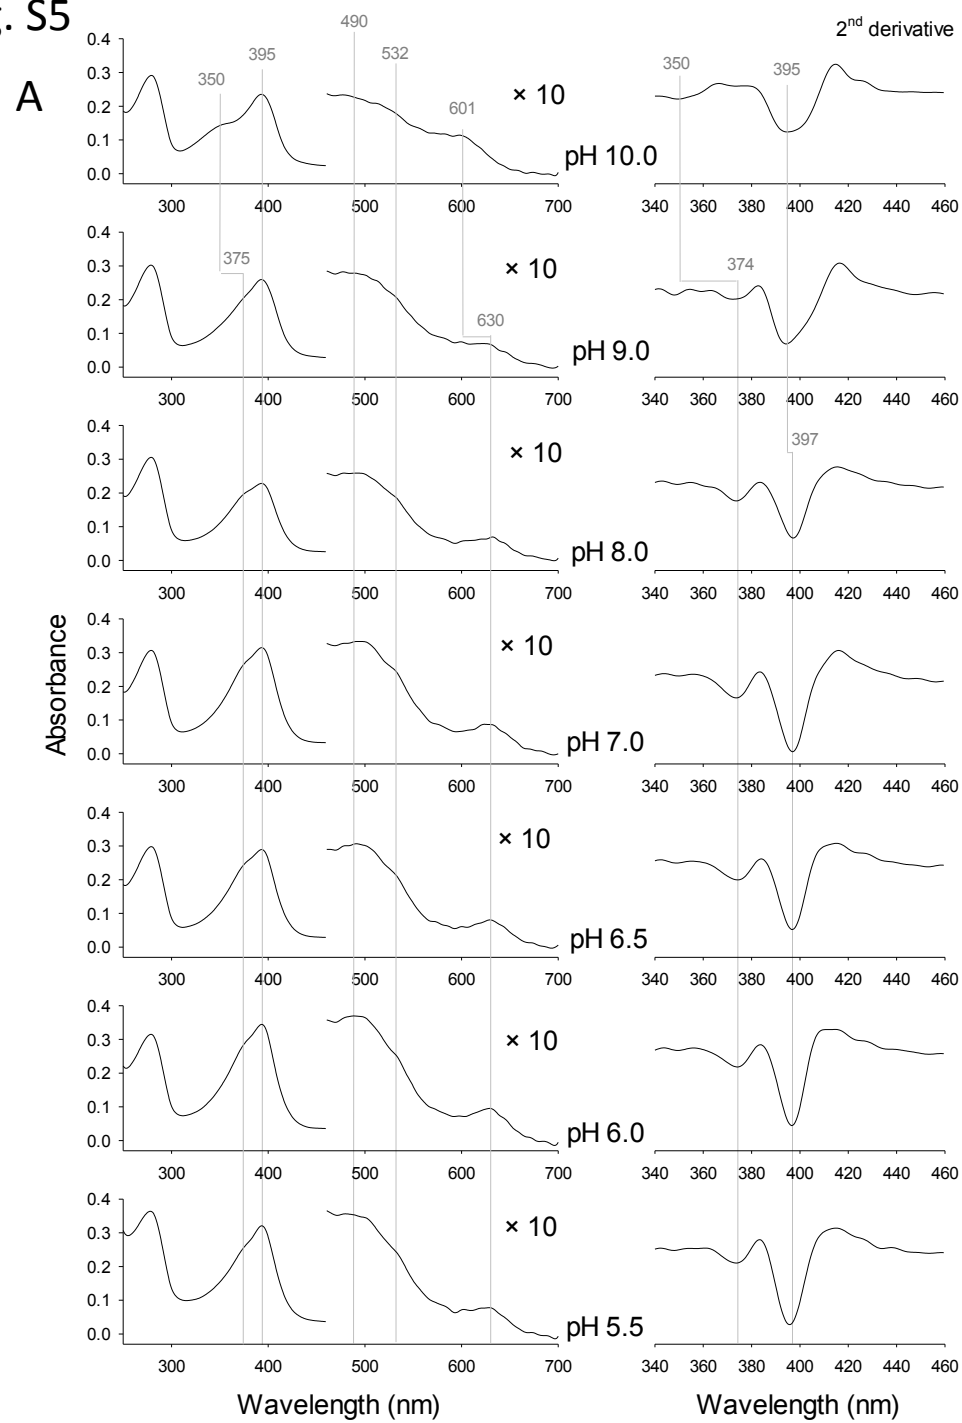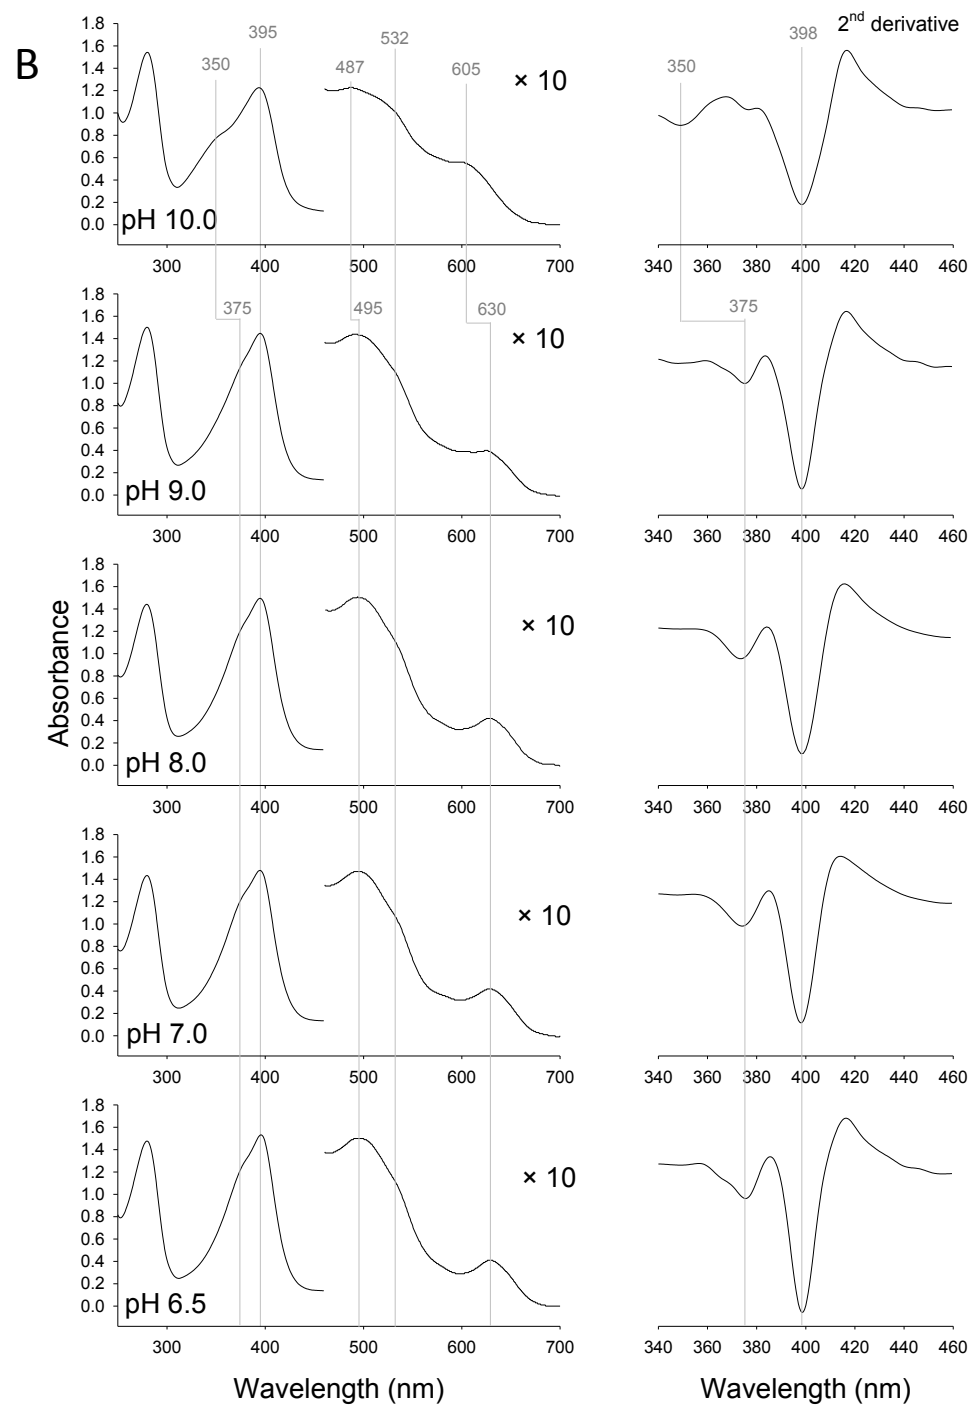

Fig. S6

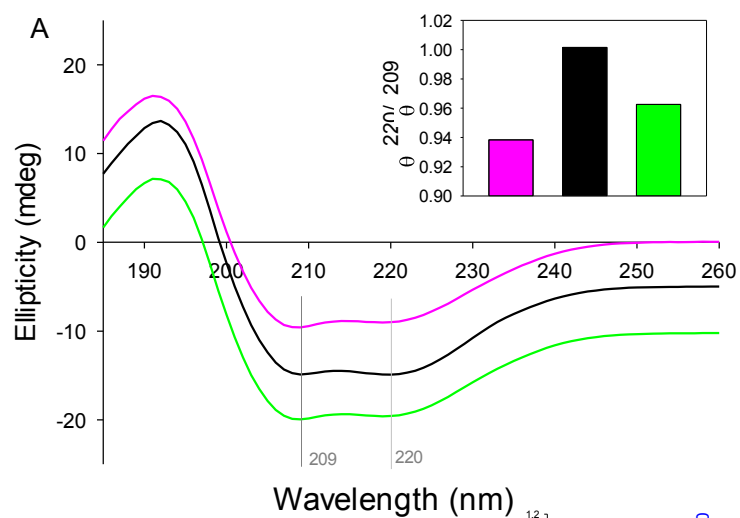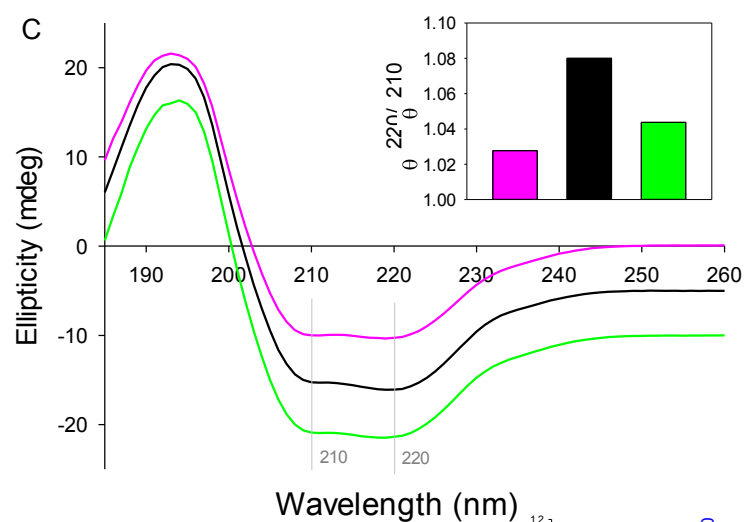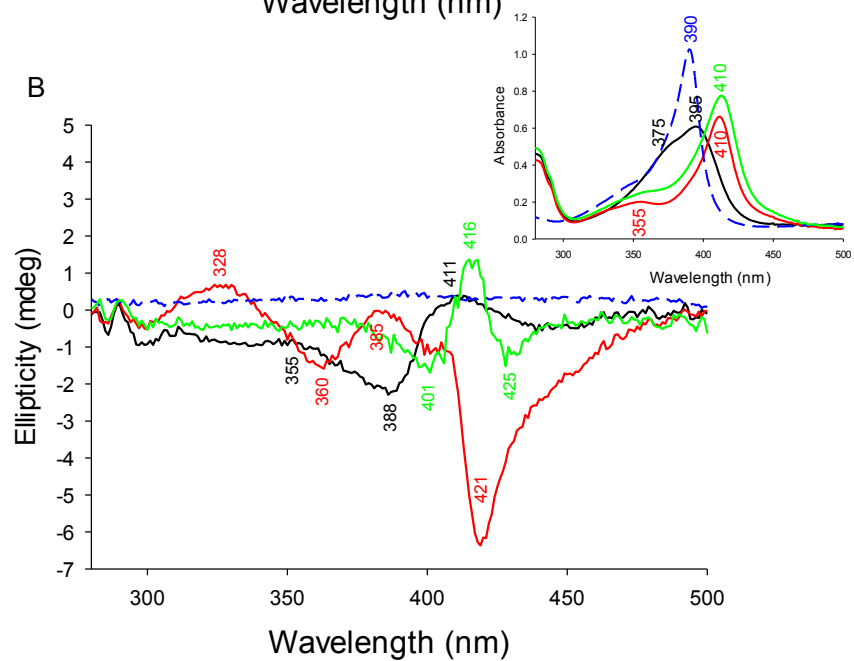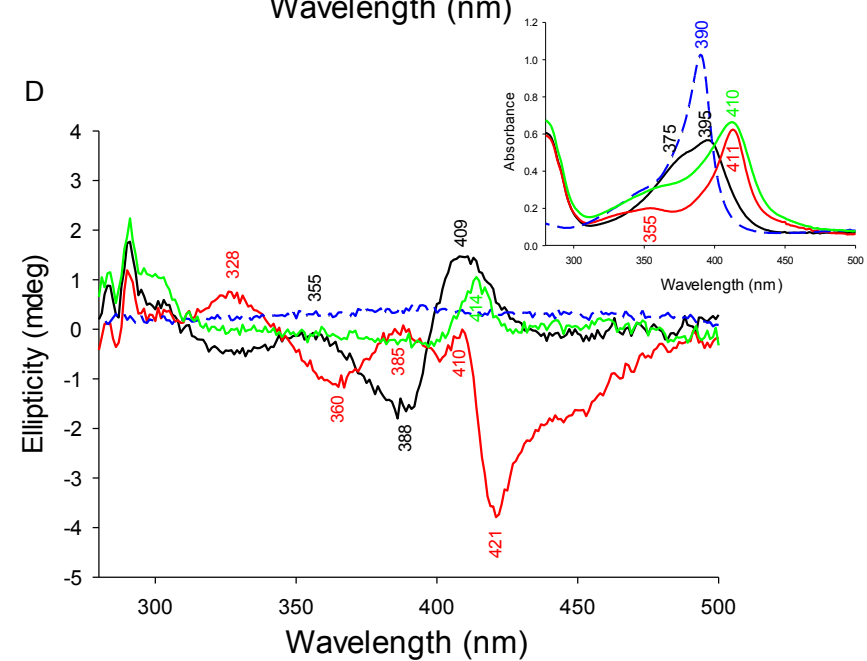



Fig. S7

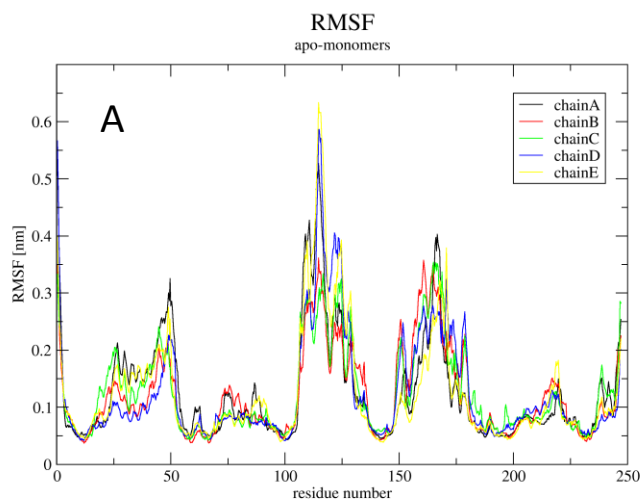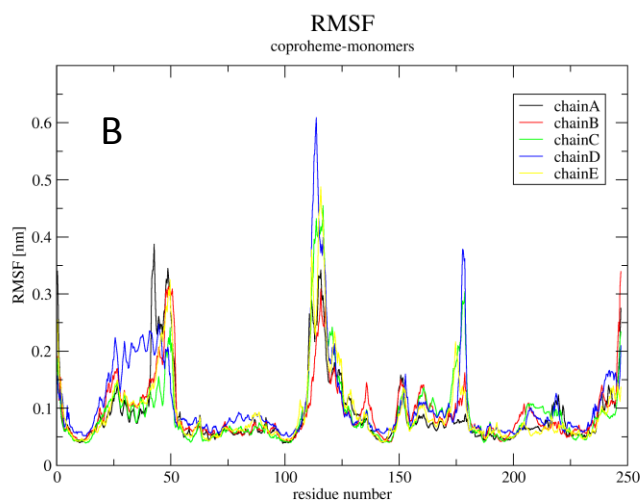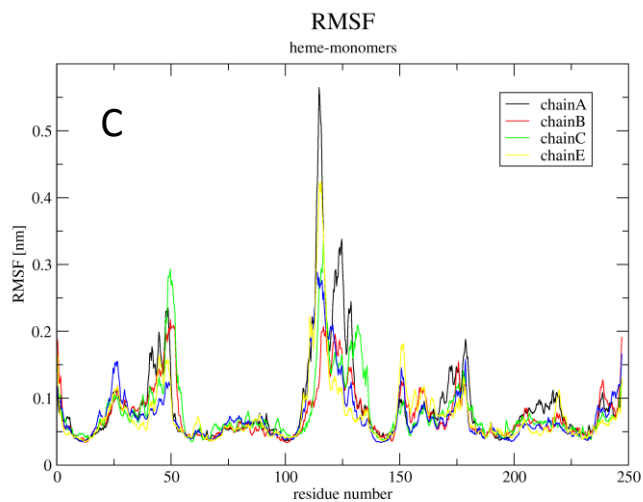

Fig. S8

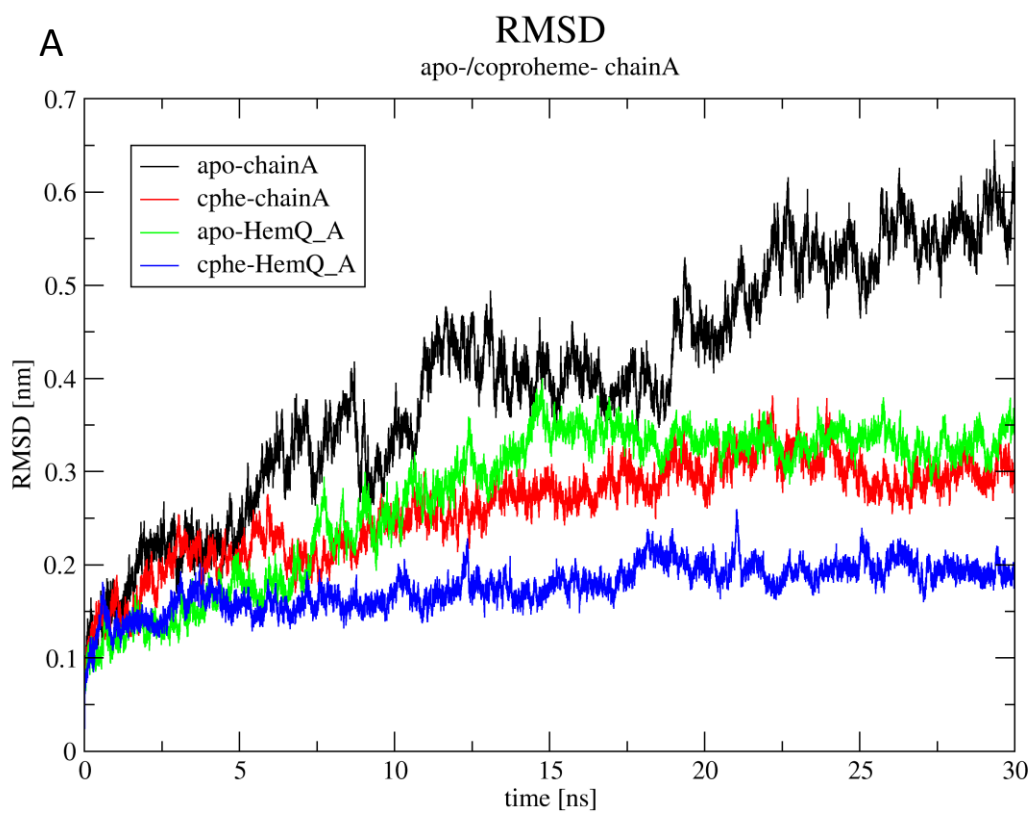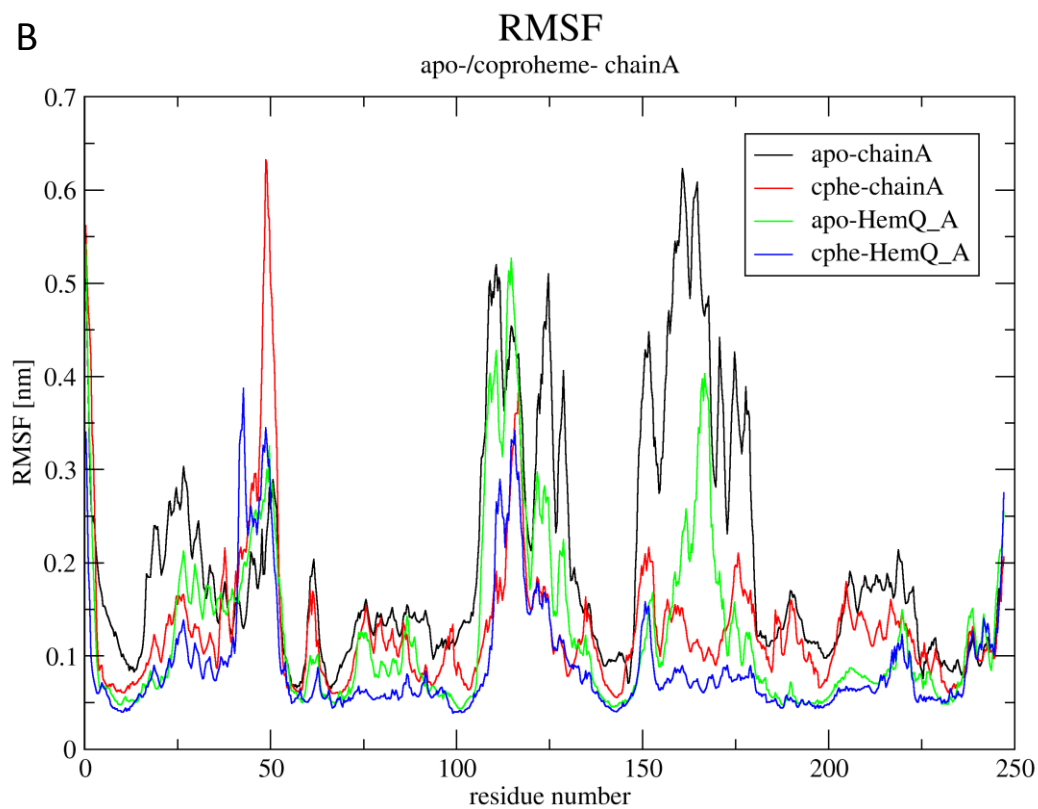

Fig. S9

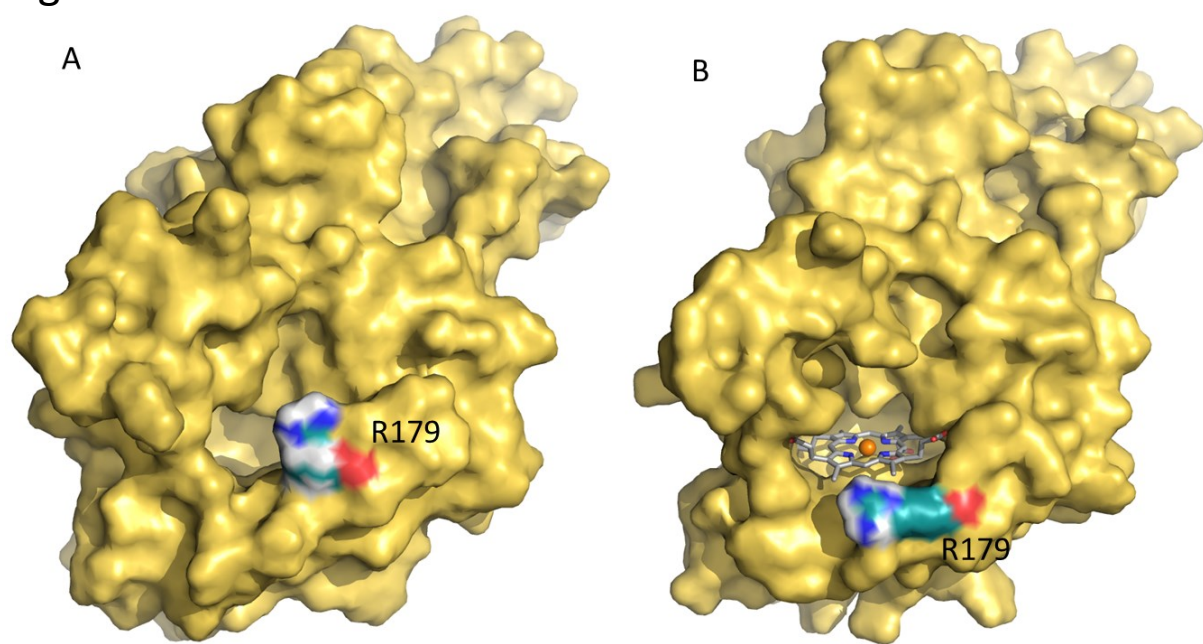

**Table S1. H-bond analysis of LmHemQ and coproheme.** Hydrogen bonds formed between the coproheme propionates (p2, p4, p6, p7) and amino acids of LmHemQ throughout the 30 ns simulation over all five subunits are represented.

| <b>H-bond Analysis: coproheme-HemQ</b> |                  |                           |                    |                  |
|----------------------------------------|------------------|---------------------------|--------------------|------------------|
| <b>Chain</b>                           | <b># H-bonds</b> | <b>interacting atoms</b>  |                    | <b># H-bonds</b> |
| <b>A</b>                               | 1                | 1:111:SER:OG:HG           | 6:1:CPHE:O1D/O2D:  | 0.96             |
|                                        | 2                | 1:112:ASN:N:H             | 6:1:CPHE:O1C:      | 0.03             |
|                                        | 3                | 1:113:TYR:N:H             | 6:1:CPHE:O1D/O2D:  | 0.92             |
|                                        | 4                | 1:113:TYR:N:H             | 6:1:CPHE:O1C:      | 0.02             |
|                                        | 5                | 1:113:TYR:OH:HH           | 6:1:CPHE:O1C/O2C:  | 0.87             |
|                                        | 6                | 1:114:LEU:N:H             | 6:1:CPHE:O1D/O2D:  | 0.94             |
|                                        | 7                | 1:115:ALA:N:H             | 6:1:CPHE:O1D/O2D:  | 0.60             |
|                                        | 8                | 1:116:SER:N:H             | 6:1:CPHE:O1D/O2D:  | 0.11             |
|                                        | 9                | 1:116:SER:OG:HG           | 6:1:CPHE:O1D/O2D:  | 0.07             |
|                                        | 10               | 1:147:TYR:OH:HH           | 6:1:CPHE:O1B/O2B:  | 0.98             |
|                                        | 11               | 1:151:LYSH:NZ:HZ1/HZ2/HZ3 | 6:1:CPHE:O1C/O2C:  | 0.15             |
|                                        | 12               | 1:159:TRP:NE1:HE1         | 6:1:CPHE:O1C/O2C:  | 0.02             |
|                                        | 13               | 1:183:GLY:N:H             | 6:1:CPHE:O1A/O2A:  | 1.26             |
|                                        | 14               | 1:187:GLN:NE2:HE21/HE22   | 6:1:CPHE:O1A/O2A:  | 0.84             |
|                                        | 15               | 1:220:ARG:NE:HE           | 6:1:CPHE:O1B/O2B:  | 0.03             |
|                                        | 16               | 1:220:ARG:NH2:HH22        | 6:1:CPHE:O1B/O2B:  | 0.05             |
| <b>B</b>                               | 17               | 2:111:SER:OG:HG           | 10:1:CPHE:O1D/O2D: | 1.01             |
|                                        | 18               | 2:113:TYR:N:H             | 10:1:CPHE:O1D/O2D: | 0.92             |
|                                        | 19               | 2:114:LEU:N:H             | 10:1:CPHE:O1D/O2D: | 1.10             |
|                                        | 20               | 2:115:ALA:N:H             | 10:1:CPHE:O1D/O2D: | 0.11             |
|                                        | 21               | 2:116:SER:N:H             | 10:1:CPHE:O1D:     | 0.85             |
|                                        | 22               | 2:116:SER:OG:HG           | 10:1:CPHE:O1D:     | 0.66             |
|                                        | 23               | 2:147:TYR:OH:HH           | 10:1:CPHE:O1B/O2B: | 1.00             |
|                                        | 24               | 2:151:LYSH:NZ:HZ1/HZ2/HZ3 | 10:1:CPHE:O1C/O2C: | 1.06             |
|                                        | 25               | 2:174:HISA:ND1:HD1        | 10:1:CPHE:O1C/O2C: | 0.88             |
|                                        | 26               | 2:183:GLY:N:H             | 10:1:CPHE:O1A/O2A: | 0.69             |
|                                        | 27               | 2:187:GLN:NE2:HE22        | 10:1:CPHE:O1A/O2A: | 0.90             |
|                                        | 28               | 2:225:SER:OG:HG           | 10:1:CPHE:O1B/O2B: | 0.11             |
| <b>C</b>                               | 29               | 3:111:SER:N:H             | 8:1:CPHE:O1D/O2D:  | 0.09             |
|                                        | 30               | 3:111:SER:OG:HG           | 8:1:CPHE:O1D/O2D:  | 0.92             |
|                                        | 31               | 3:113:TYR:N:H             | 8:1:CPHE:O1D/O2D:  | 0.66             |
|                                        | 32               | 3:113:TYR:OH:HH           | 8:1:CPHE:O1C/O2C:  | 0.49             |
|                                        | 33               | 3:114:LEU:N:H             | 8:1:CPHE:O1D/O2D:  | 0.98             |
|                                        | 34               | 3:115:ALA:N:H             | 8:1:CPHE:O1D/O2D:  | 0.87             |

|    |                           |                   |      |
|----|---------------------------|-------------------|------|
| 35 | 3:116:SER:N:H             | 8:1:CPHE:O1D/O2D: | 0.11 |
| 36 | 3:116:SER:OG:HG           | 8:1:CPHE:O1D/O2D: | 0.05 |
| 37 | 3:147:TYR:OH:HH           | 8:1:CPHE:O1B/O2B: | 0.99 |
| 38 | 3:151:LYSH:NZ:HZ1/HZ2/HZ3 | 8:1:CPHE:O1C/O2C: | 0.94 |
| 39 | 3:159:TRP:NE1:HE1         | 8:1:CPHE:O1C/O2C: | 0.05 |
| 40 | 3:179:ARG:NE:HE           | 8:1:CPHE:O1A/O2A: | 0.07 |
| 41 | 3:179:ARG:NH1:HH11/HH12   | 8:1:CPHE:O1A/O2A: | 0.01 |
| 42 | 3:179:ARG:NH2:HH21/HH22   | 8:1:CPHE:O1A/O2A: | 0.04 |
| 43 | 3:183:GLY:N:H             | 8:1:CPHE:O1A/O2A: | 0.14 |
| 44 | 3:187:GLN:NE2:HE21/HE22   | 8:1:CPHE:O1A/O2A: | 0.03 |
| 45 | 3:220:ARG:NH2:HH22        | 8:1:CPHE:O1B:     | 0.02 |
| 46 | 3:225:SER:OG:HG           | 8:1:CPHE:O1B/O2B: | 0.96 |

**Chain  
D**

|    |                           |                   |      |
|----|---------------------------|-------------------|------|
| 47 | 4:111:SER:N:H             | 7:1:CPHE:O1D/O2D: | 0.91 |
| 48 | 4:111:SER:OG:HG           | 7:1:CPHE:O1D/O2D: | 0.30 |
| 49 | 4:113:TYR:OH:HH           | 7:1:CPHE:O1C/O2C: | 0.63 |
| 50 | 4:133:ARG:NH1:HH11        | 7:1:CPHE:O1A/O2A: | 0.10 |
| 51 | 4:133:ARG:NH2:HH21/HH22   | 7:1:CPHE:O1A/O2A: | 0.11 |
| 52 | 4:147:TYR:OH:HH           | 7:1:CPHE:O1B/O2B: | 1.11 |
| 53 | 4:151:LYSH:NZ:HZ1/HZ2/HZ3 | 7:1:CPHE:O1C/O2C: | 0.41 |
| 54 | 4:159:TRP:NE1:HE1         | 7:1:CPHE:O1C/O2C: | 0.06 |
| 55 | 4:186:GLN:NE2:HE22/HE21   | 7:1:CPHE:O1A/O2A: | 0.06 |
| 56 | 4:187:GLN:N:H             | 7:1:CPHE:O1A/O2A: | 0.86 |
| 57 | 4:187:GLN:NE2:HE21/HE22   | 7:1:CPHE:O1B/O2B: | 0.57 |

**Chain  
E**

|    |                           |                   |      |
|----|---------------------------|-------------------|------|
| 58 | 5:111:SER:OG:HG           | 9:1:CPHE:O1D/O2D: | 0.85 |
| 59 | 5:111:SER:OG:HG           | 9:1:CPHE:O1C/O2C: | 0.16 |
| 60 | 5:112:ASN:N:H             | 9:1:CPHE:O1C/O2C: | 0.11 |
| 61 | 5:113:TYR:N:H             | 9:1:CPHE:O1D/O2D: | 0.98 |
| 62 | 5:113:TYR:OH:HH           | 9:1:CPHE:O1C/O2C: | 0.75 |
| 63 | 5:114:LEU:N:H             | 9:1:CPHE:O1D/O2D: | 0.87 |
| 64 | 5:115:ALA:N:H             | 9:1:CPHE:O1D/O2D: | 0.76 |
| 65 | 5:147:TYR:OH:HH           | 9:1:CPHE:O1B/O2B: | 0.97 |
| 66 | 5:151:LYSH:NZ:HZ1/HZ2/HZ3 | 9:1:CPHE:O1C/O2C: | 0.53 |
| 67 | 5:159:TRP:NE1:HE1         | 9:1:CPHE:O1C/O2C: | 0.14 |
| 68 | 5:183:GLY:N:H             | 9:1:CPHE:O1A/O2A: | 0.99 |
| 69 | 5:187:GLN:NE2:HE21/HE22   | 9:1:CPHE:O1A/O2A: | 0.90 |
| 70 | 5:200:TRP:NE1:HE1         | 9:1:CPHE:O1C/O2C: | 0.02 |
| 71 | 5:225:SER:OG:HG           | 9:1:CPHE:O1B/O2B: | 0.97 |
